# Supplementary material for: Bimetallic CoSe2/FeSe2 hollow nanocuboids assembled by nanoparticles as a positive electrode material for a high-performance hybrid supercapacitor
Source: Royal Society of Chemistry journal article supplement (doi:10.1039/d2dt02058k), 2022-01-01
Supplement: d2dt02058k1.pdf [file d2dt02058k1.pdf]

## Supporting Information

### **Bimetallic CoSe<sub>2</sub>/FeSe<sub>2</sub> hollow nanocuboids assembled by nanoparticles as positive electrode material for a high-performance hybrid supercapacitor**

Majid shirvani, Saied Saeed Hosseiny Davarani\*

Department of Chemistry, Shahid Beheshti University, G. C., 1983963113, Evin,  
Tehran, Iran.

\*Corresponding author, Tel: +98 21 22431661; Fax: +98 21 22431661;  
E-mail: ss-hosseiny@sbu.ac.ir

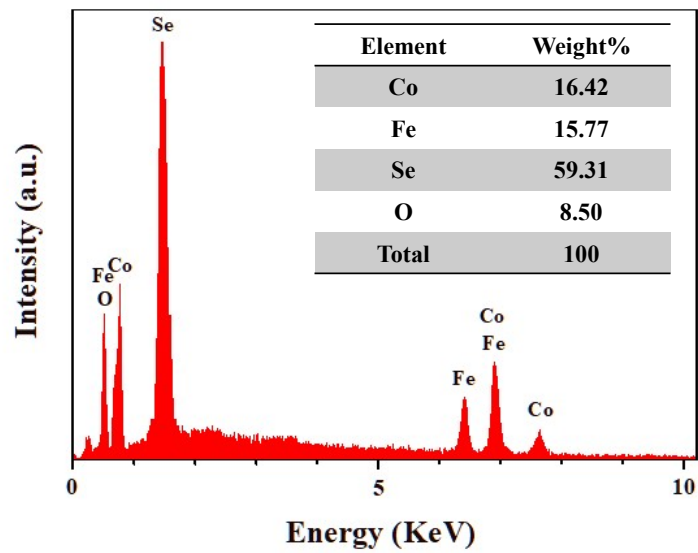

**Figure S1.** EDX spectrum of the CoSe<sub>2</sub>/FeSe<sub>2</sub> HNCs sample.

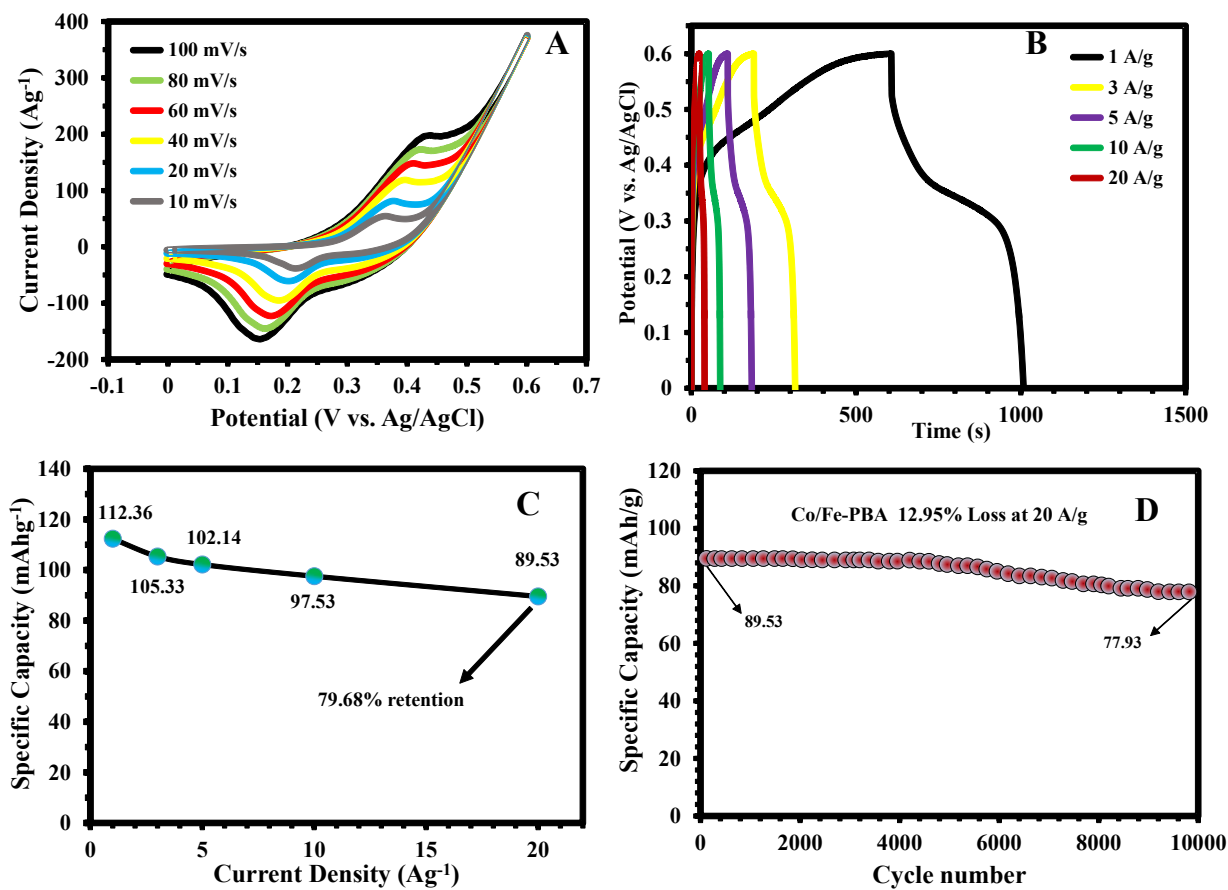

**Figure S2.** (A) CV curves of the Co/Fe-PBA@NiF electrode at various scan rates of 10-100  $\text{mVs}^{-1}$ . (B) GCD curves of the Co/Fe-PBA@NiF electrode at various current densities of 1-20  $\text{Ag}^{-1}$ . (C) Specific capacity ( $\text{mAhg}^{-1}$ ) vs. current density ( $\text{Ag}^{-1}$ ) of the Co/Fe/PBA@NiF electrode. (D) Durability of the Co/Fe-PBA@NiF electrode at 20  $\text{Ag}^{-1}$ .

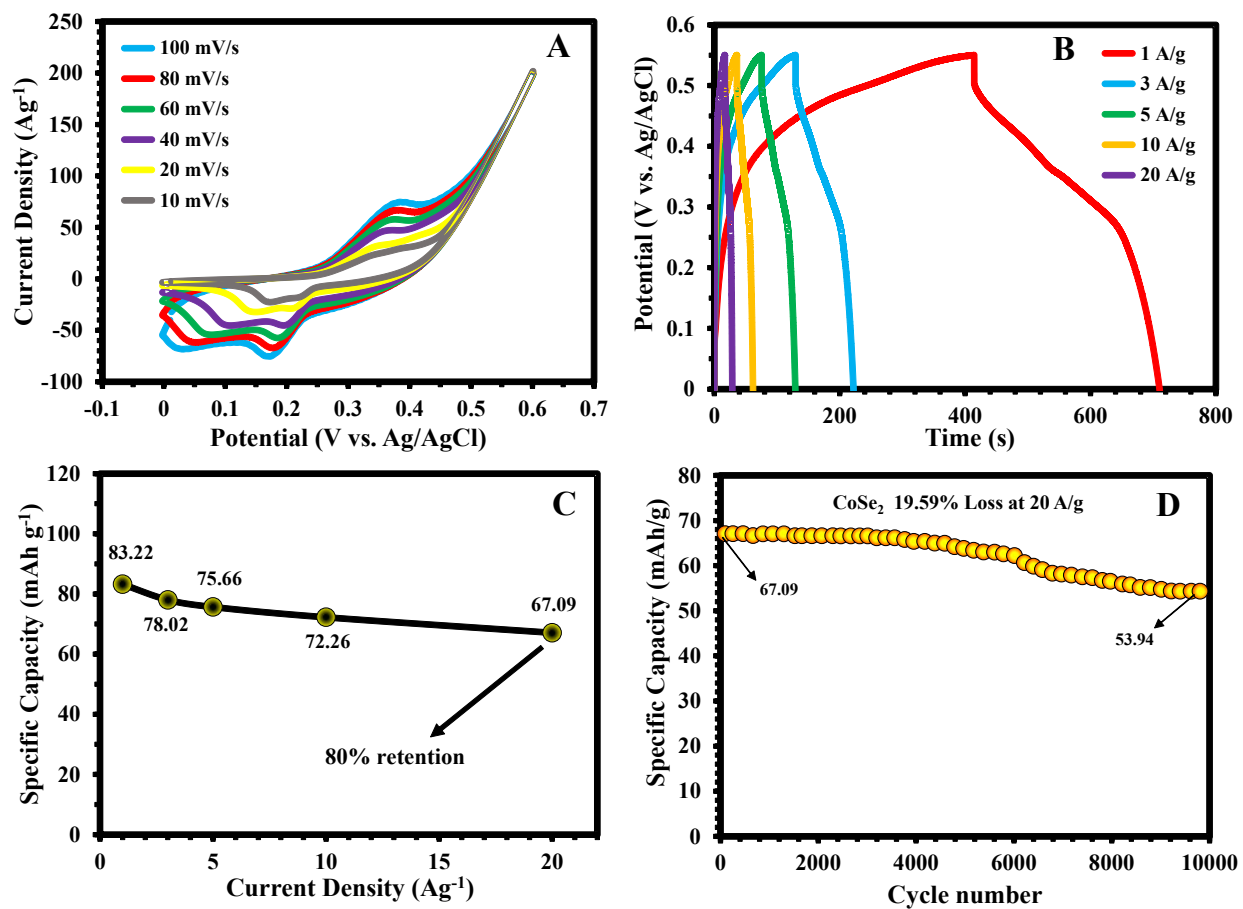

**Figure S3.** (A) CV curves of the  $\text{CoSe}_2@NiF$  electrode at various scan rates of 10-100  $\text{mVs}^{-1}$ . (B) GCD curves of the  $\text{CoSe}_2@NiF$  electrode at various current densities of 1-20  $\text{A g}^{-1}$ . (C) Specific capacity ( $\text{mAhg}^{-1}$ ) vs. current density ( $\text{Ag}^{-1}$ ) of the  $\text{CoSe}_2@NiF$  electrode. (D) Durability of the  $\text{CoSe}_2@NiF$  electrode at 20  $\text{Ag}^{-1}$ .

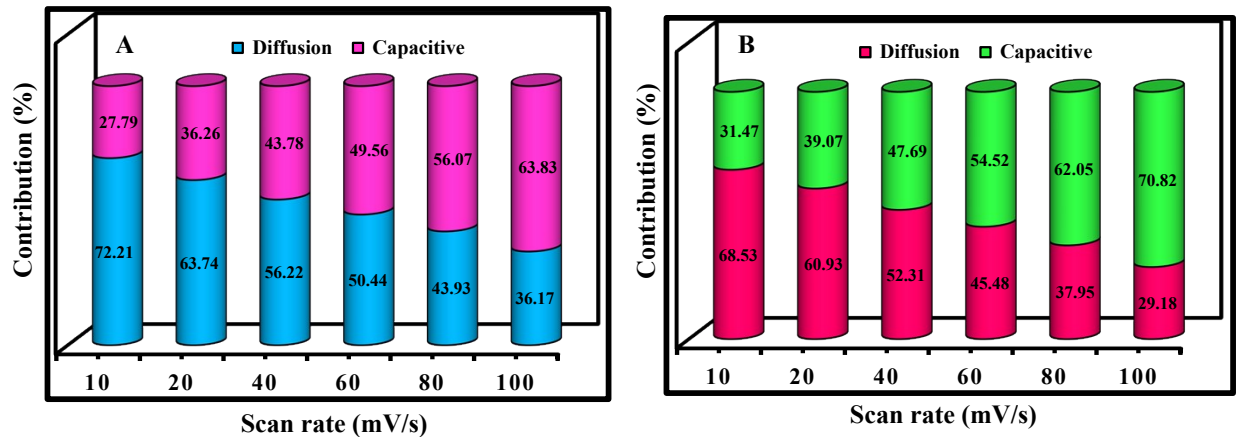

**Figure S4.** Relative contribution of the capacitive and diffusion-controlled charge storage at different scan rates of (A) Co/Fe-PBA@NiF and (B) CoSe<sub>2</sub>@NiF electrodes.

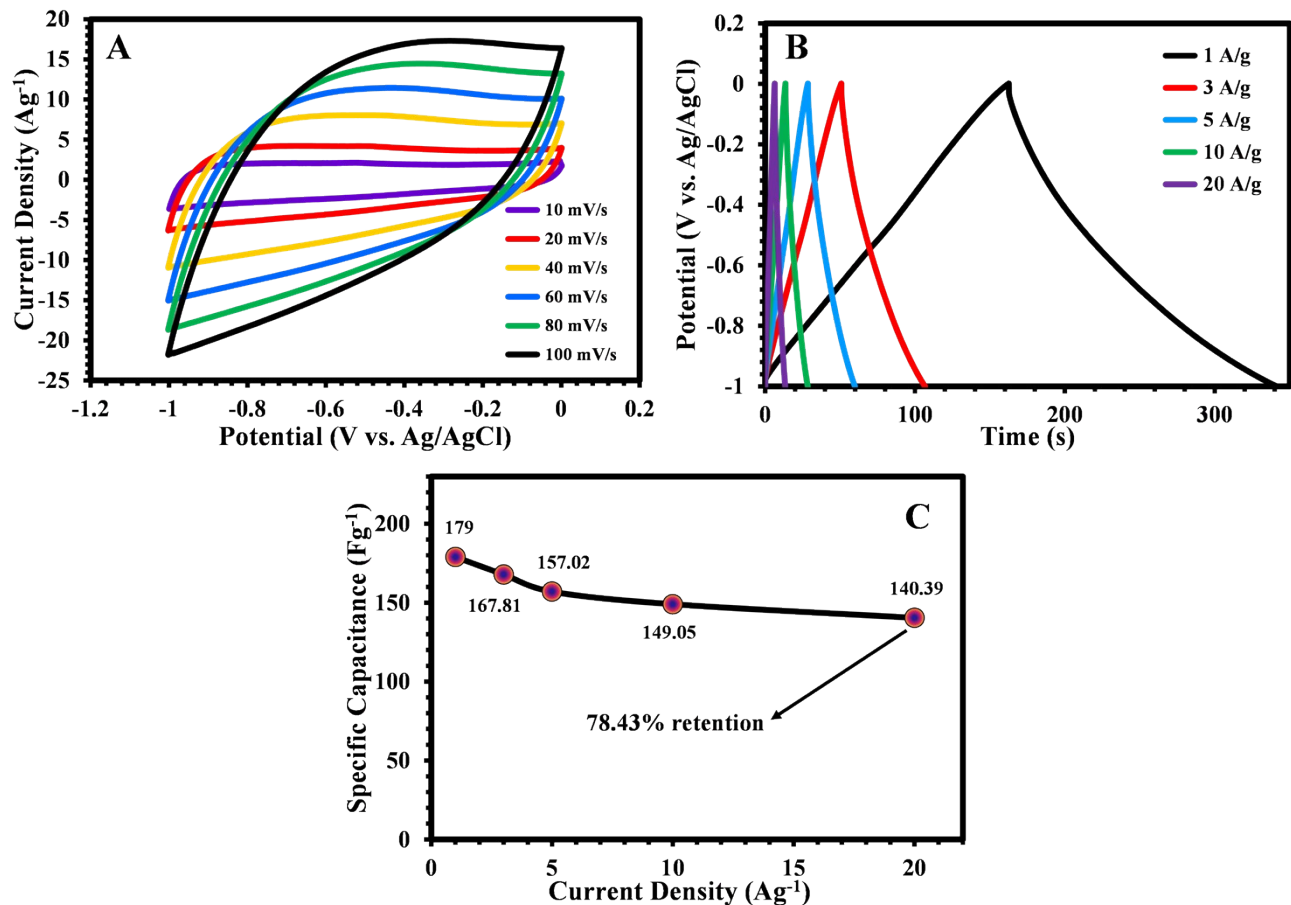

**Figure S5.** (A) CV curves of the active carbon-based electrode at various scan rates of 10-100 mVs<sup>-1</sup>. (B) GCD curves of the active carbon-based electrode at various current densities of 1-20 A g<sup>-1</sup>. (C) Specific capacitance (Fg<sup>-1</sup>) vs. current density (Ag<sup>-1</sup>) of the active carbon-based electrode.

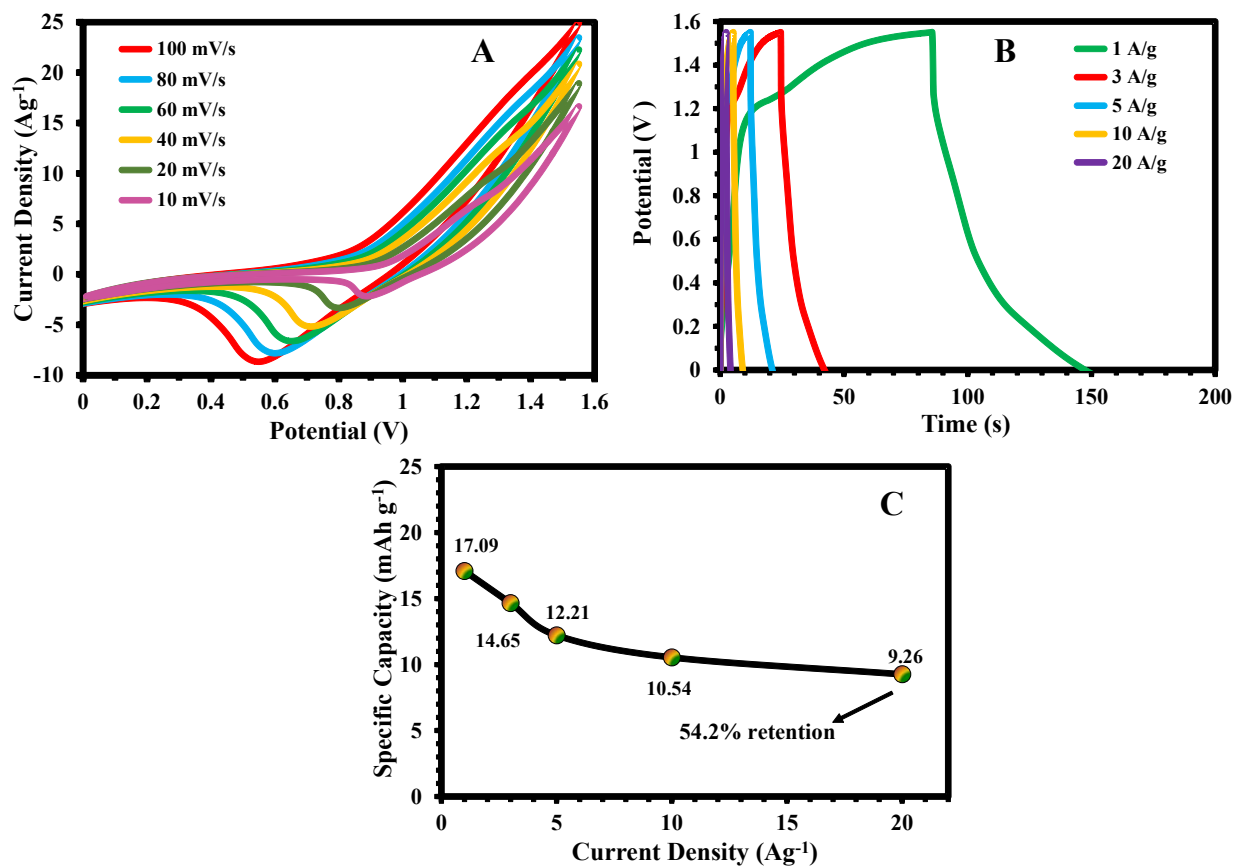

**Figure S6.** (A) CV curves of the CoSe<sub>2</sub>@NiF||AC@NiF device at various scan rates of 10-100 mVs<sup>-1</sup>. (B) GCD curves of the CoSe<sub>2</sub>@NiF||AC@NiF device at various current densities of 1-20 A g<sup>-1</sup>. (C) Specific capacity (mAhg<sup>-1</sup>) vs. current density (Ag<sup>-1</sup>) of the CoSe<sub>2</sub>@NiF||AC@NiF device.

**Table S1.** Comparison of the electrochemical performance of the CoSe<sub>2</sub>@FeSe<sub>2</sub> HNCs electrode material in three and two electrode systems with other previously reported Se-based electrode materials.

| Electrode materials | Capacitance | Cycle, | ED | Ref. |
|---------------------|-------------|--------|----|------|
|---------------------|-------------|--------|----|------|

|                                                              | (2 and 3 Electrodes) (F/g)         | retention                              | (Wh/Kg)      |                  |
|--------------------------------------------------------------|------------------------------------|----------------------------------------|--------------|------------------|
| <b>CoSe<sub>2</sub>@NiSe<sub>2</sub></b>                     | <b>1434 (3E)<br/>57.5 (2E)</b>     | <b>20000, 87.5%<br/>20000, 86.6%</b>   | <b>20.4</b>  | <b>1</b>         |
| <b>NiCo<sub>2</sub>Se<sub>4</sub></b>                        | <b>1762.1 (3E)<br/>67.3 (2E)</b>   | <b>10000, 82%<br/>10000, 90%</b>       | <b>24.03</b> | <b>2</b>         |
| <b>CuSe@NiSe</b>                                             | <b>1478 (3E)<br/>333 (2E)</b>      | <b>10000, 81.7%<br/>10000, 79.3%</b>   | <b>18.65</b> | <b>3</b>         |
| <b>(Ni<sub>0.75</sub>Co<sub>0.25</sub>)Se<sub>2</sub>@NC</b> | <b>766.57 (3E)<br/>73.6(2E)</b>    | <b>-<br/>5000, 88.7%</b>               | <b>26.2</b>  | <b>4</b>         |
| <b>NiSe<sub>2</sub>/CoSe<sub>2</sub></b>                     | <b>1029 (3E)<br/>165 (2E)</b>      | <b>5000, 109.8%<br/>5000, 92.2%</b>    | <b>53.7</b>  | <b>5</b>         |
| <b>CoSe<sub>2</sub>@FeSe<sub>2</sub> HNCs</b>                | <b>1996.5 (3E)<br/>177.86 (2E)</b> | <b>10000, 91.47%<br/>10000, 91.14%</b> | <b>63.62</b> | <b>This work</b> |

## References

- 1 J. Wang, S. Sarwar, J. Song, L. Du, T. Li, Y. Zhang, B. Li, Q. Guo, J. Luo and X. Zhang, *Journal of Alloys and Compounds*, 2022, **892**, 162079.

- 2 Z. Guo, Y. Diao, X. Han, Z. Liu, Y. Ni and L. Zhang, *CrystEngComm*, 2021, **23**, 2099-2112.
- 3 Y.-f. Deng, Y. Chen, X.-l. Zhang, Q. Zhang, Z.-j. Wei and D. Wang, *Journal of Alloys and Compounds*, 2022, **892**, 162159.
- 4 Z. Li, M. Tian, Y. Chen, Y. Liu, Y. Cai and W. Wei, *Ceramics International*, 2021, **47**, 12623-12630.
- 5 X. Yun, T. Lu, R. Zhou, Z. Lu, J. Li and Y. Zhu, *Chemical Engineering Journal*, 2021, **426**, 131328.
